# Supplementary material for: Steric shielding vs. σ–π orbital interactions in triplet–triplet energy transfer
Source: Royal Society of Chemistry journal article supplement (doi:10.1039/c5sc00823a), 2015-01-01
Supplement: c5sc00823a1.pdf [file c5sc00823a1.pdf]

## **ELECTRONIC SUPPLEMENTARY INFORMATION**

### Steric shielding *vs* $\sigma$ – $\pi$ orbital interactions in triplet-triplet energy transfer

Inmaculada Andreu,<sup>a</sup> Isabel Morera,<sup>b</sup> Fabrizio Palumbo,<sup>c</sup> Germán Sastre,<sup>c</sup>  
Francisco Bosca,<sup>c,\*</sup> and Miguel A. Miranda<sup>c,\*</sup>

#### **Table of Contents**

|                                                                                     |    |
|-------------------------------------------------------------------------------------|----|
| 1. <sup>1</sup> H and <sup>13</sup> C-NMR spectra of ( <i>S</i> )-SUP- $\alpha$ -Ch | S2 |
| 2. <sup>1</sup> H and <sup>13</sup> C-NMR spectra of ( <i>R</i> )-SUP- $\alpha$ -Ch | S3 |
| 3. <sup>1</sup> H and <sup>13</sup> C-NMR spectra of SUP- $\beta$ -Ch               | S4 |
| 4. <sup>1</sup> H and <sup>13</sup> C-NMR spectra of TPA- $\alpha$ -Ch <sub>H</sub> | S5 |
| 5. Optimized geometries using PBE-D3                                                | S6 |
| 6. Optimized geometries using M062X-D3                                              | S7 |
| 7. Optimized geometries using wB97XD                                                | S8 |

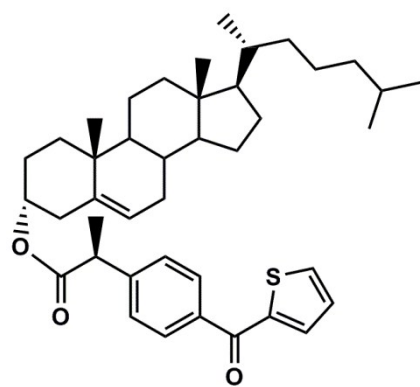

(CDCl<sub>3</sub>, 300 MHz)

(S)-SUP- $\alpha$ -Ch

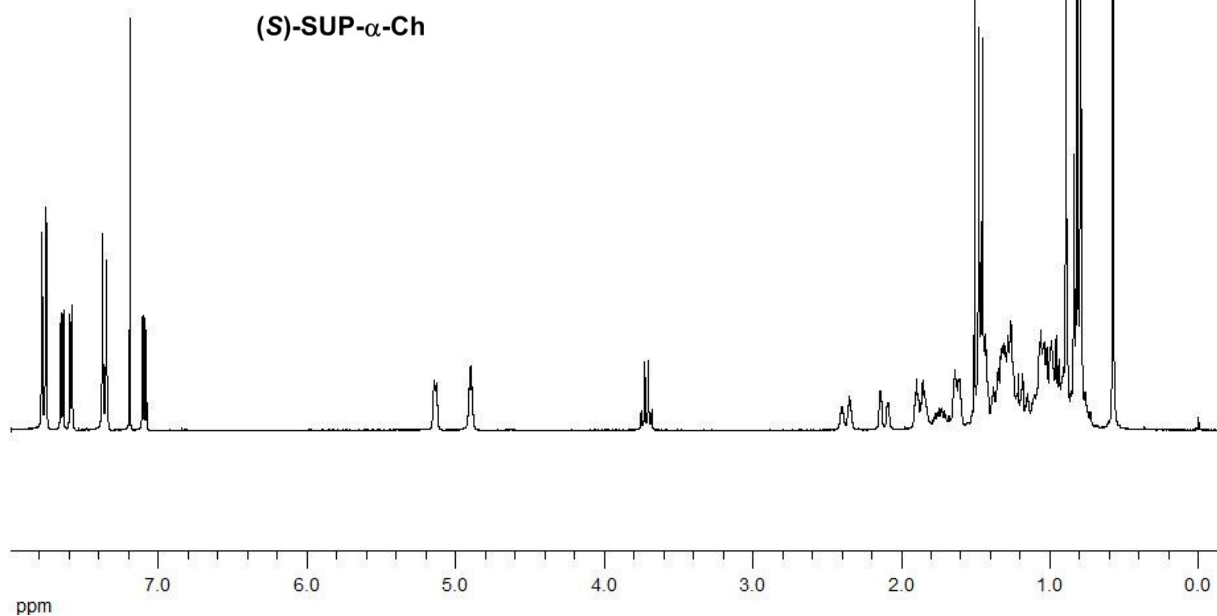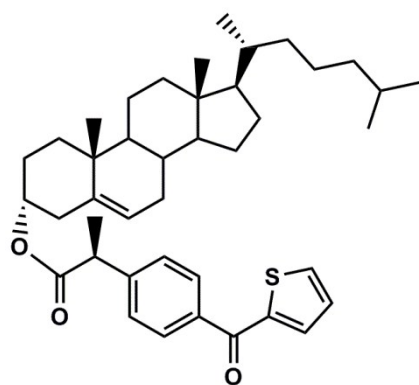

(CDCl<sub>3</sub>, 75 MHz)

(S)-SUP- $\alpha$ -Ch

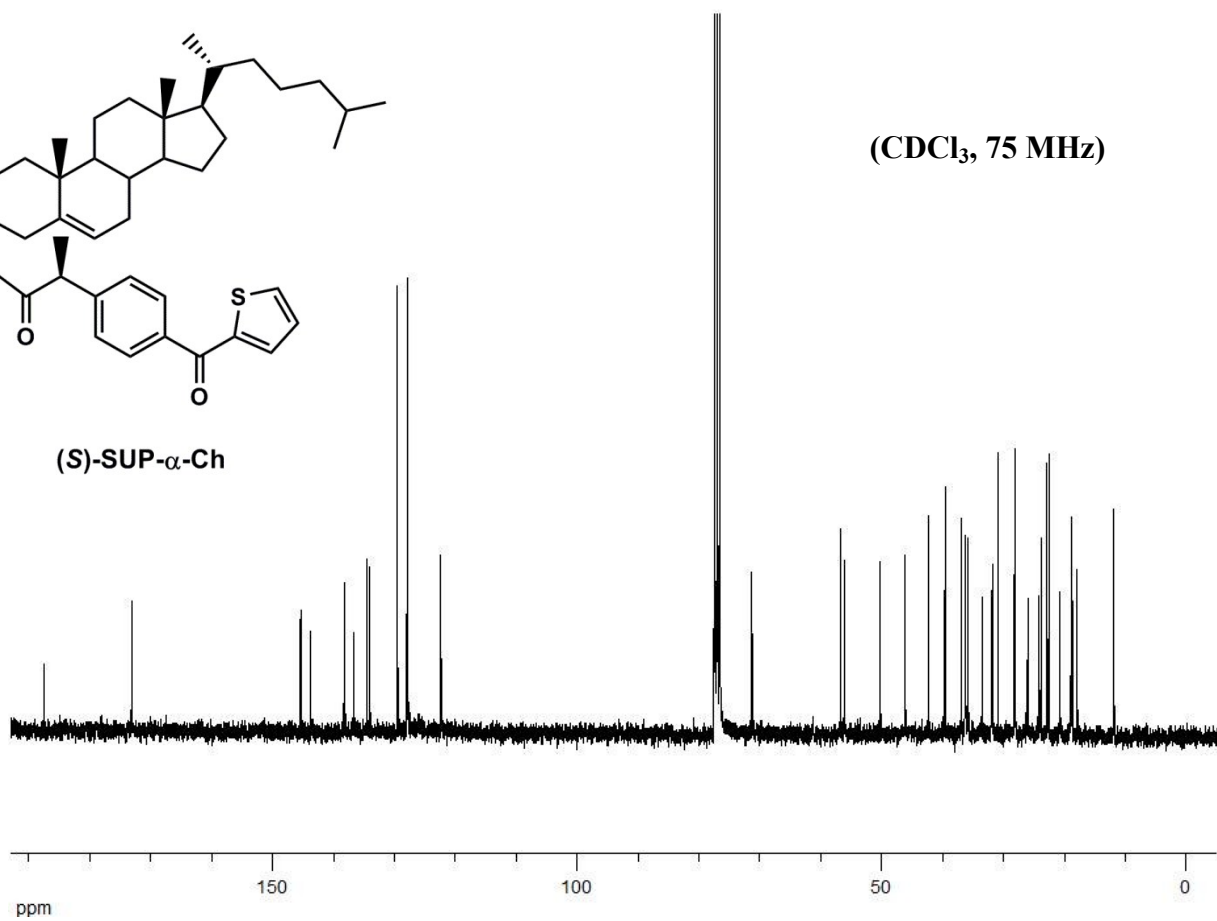

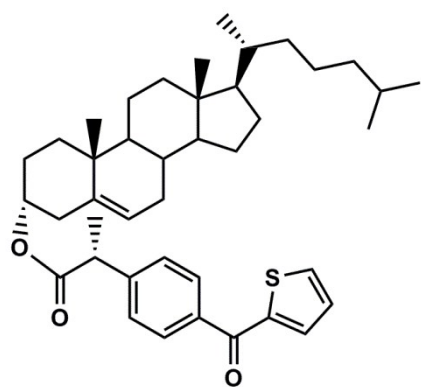

(CDCl<sub>3</sub>, 300 MHz)

(R)-SUP-α-Ch

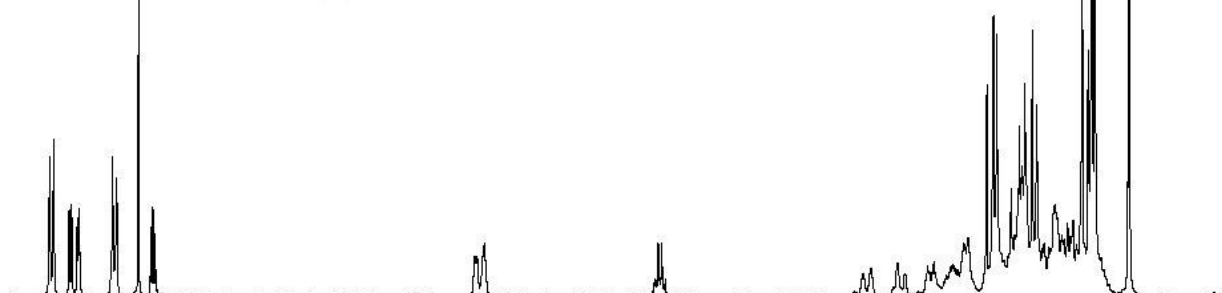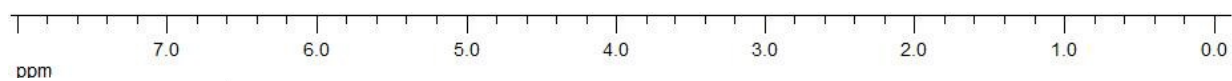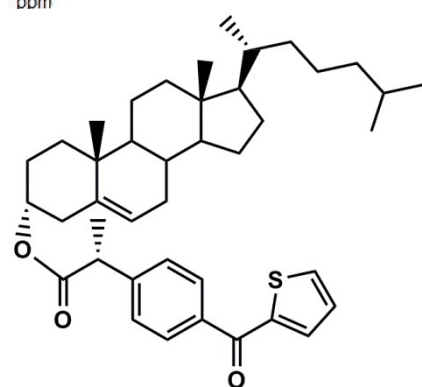

(R)-SUP-α-Ch

(CDCl<sub>3</sub>, 75 MHz)

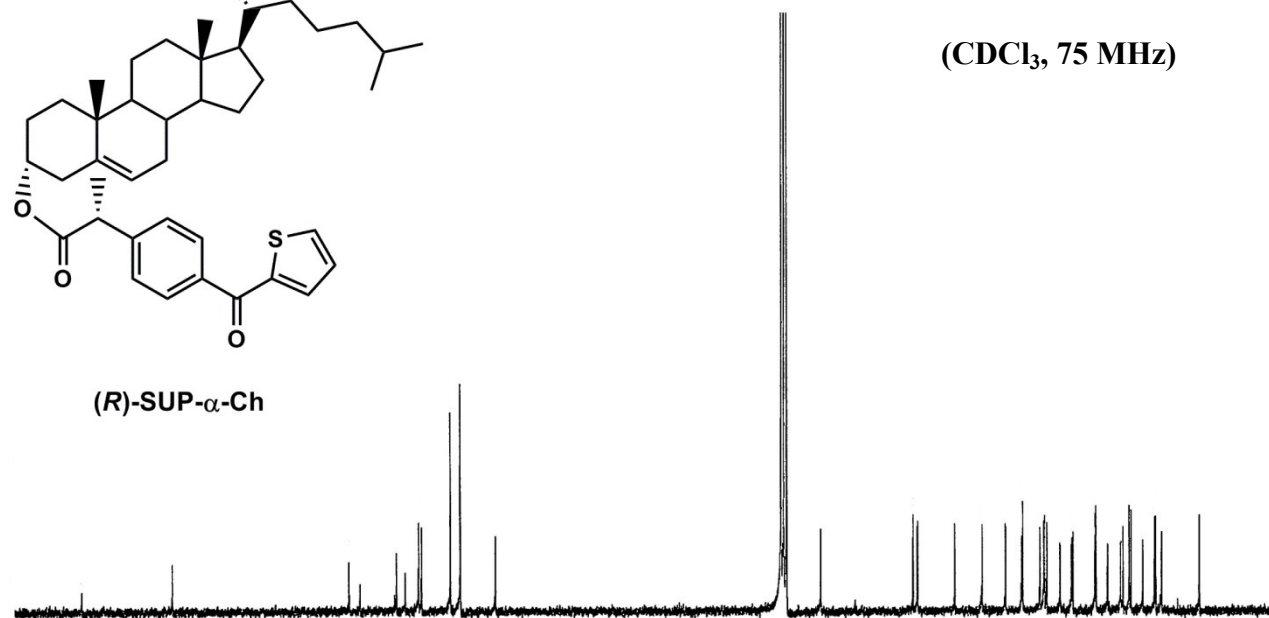

ppm

150

100

50

(CDCl<sub>3</sub>, 300 MHz)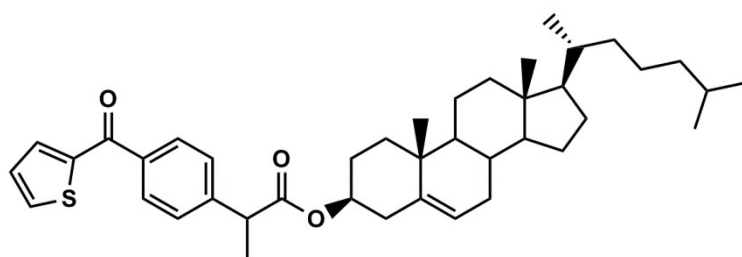SUP- $\beta$ -Ch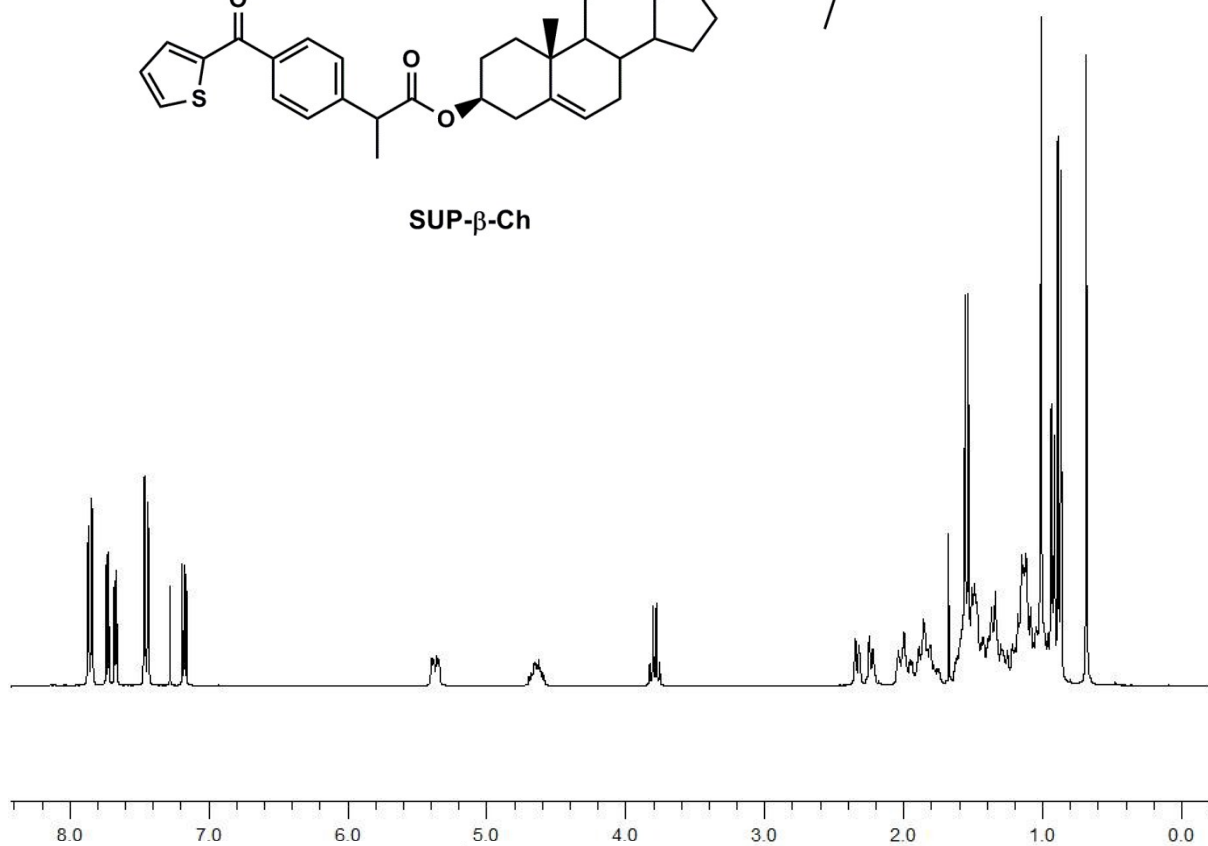(CDCl<sub>3</sub>, 75 MHz)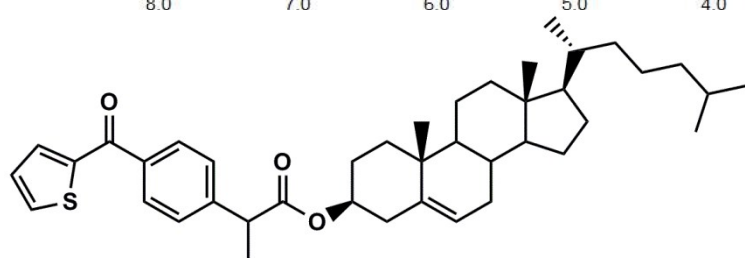SUP- $\beta$ -Ch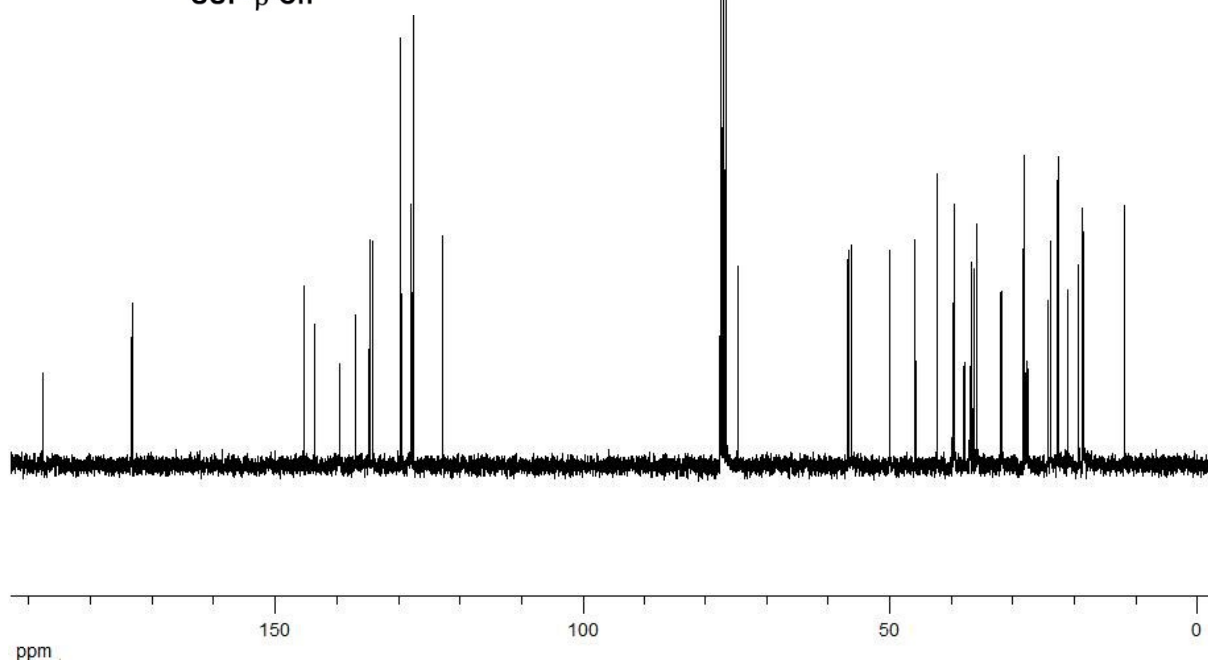

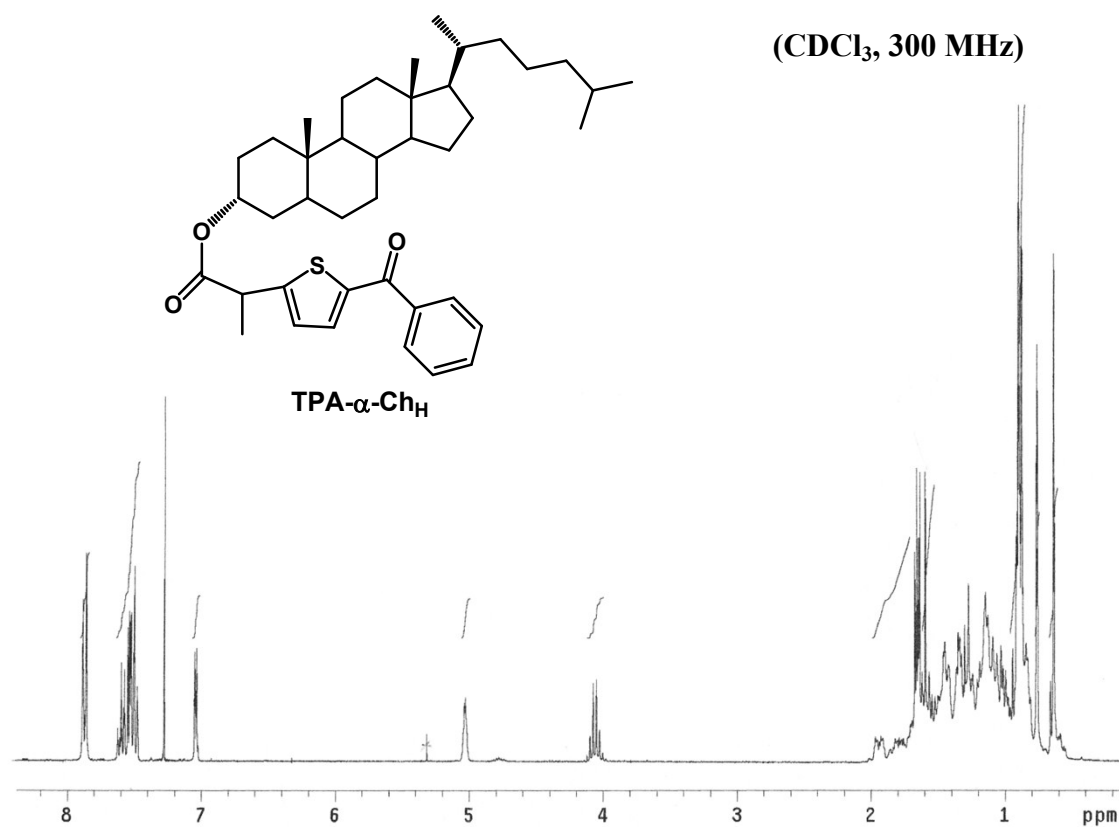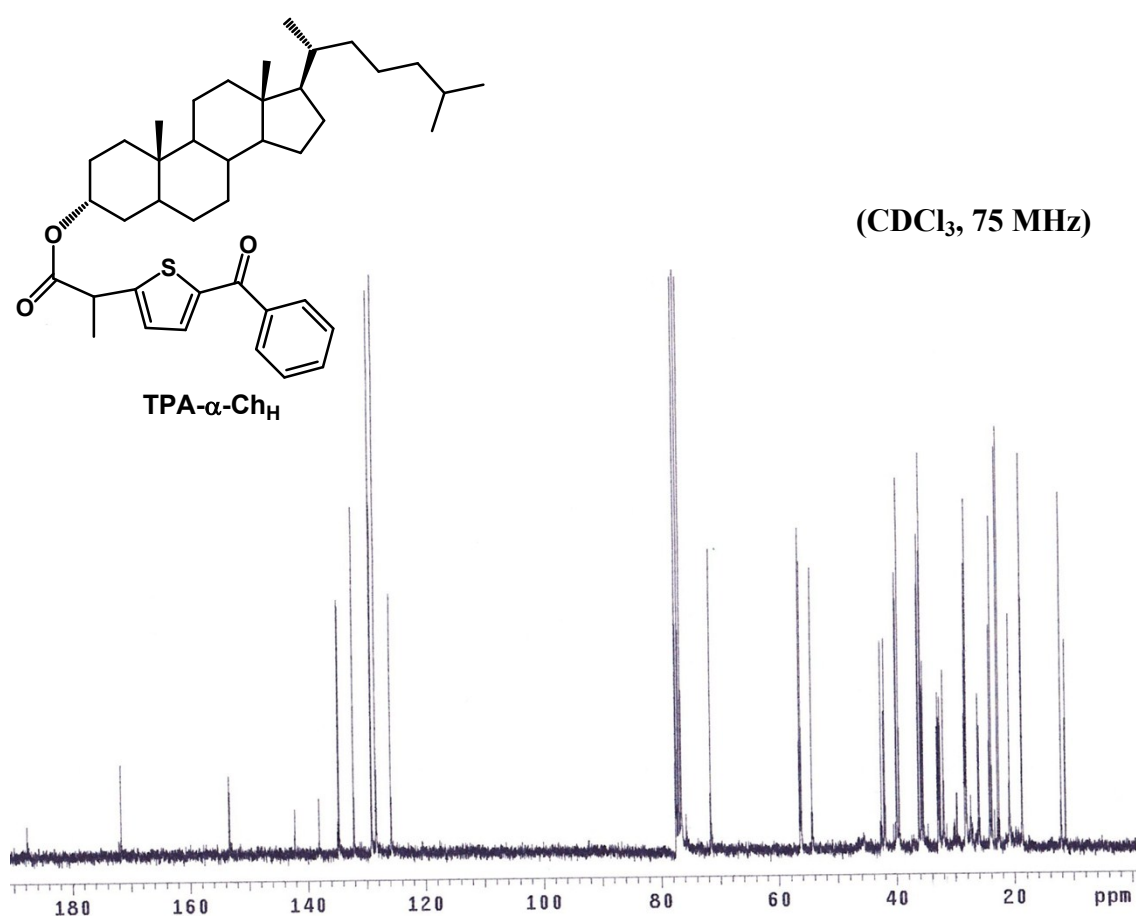

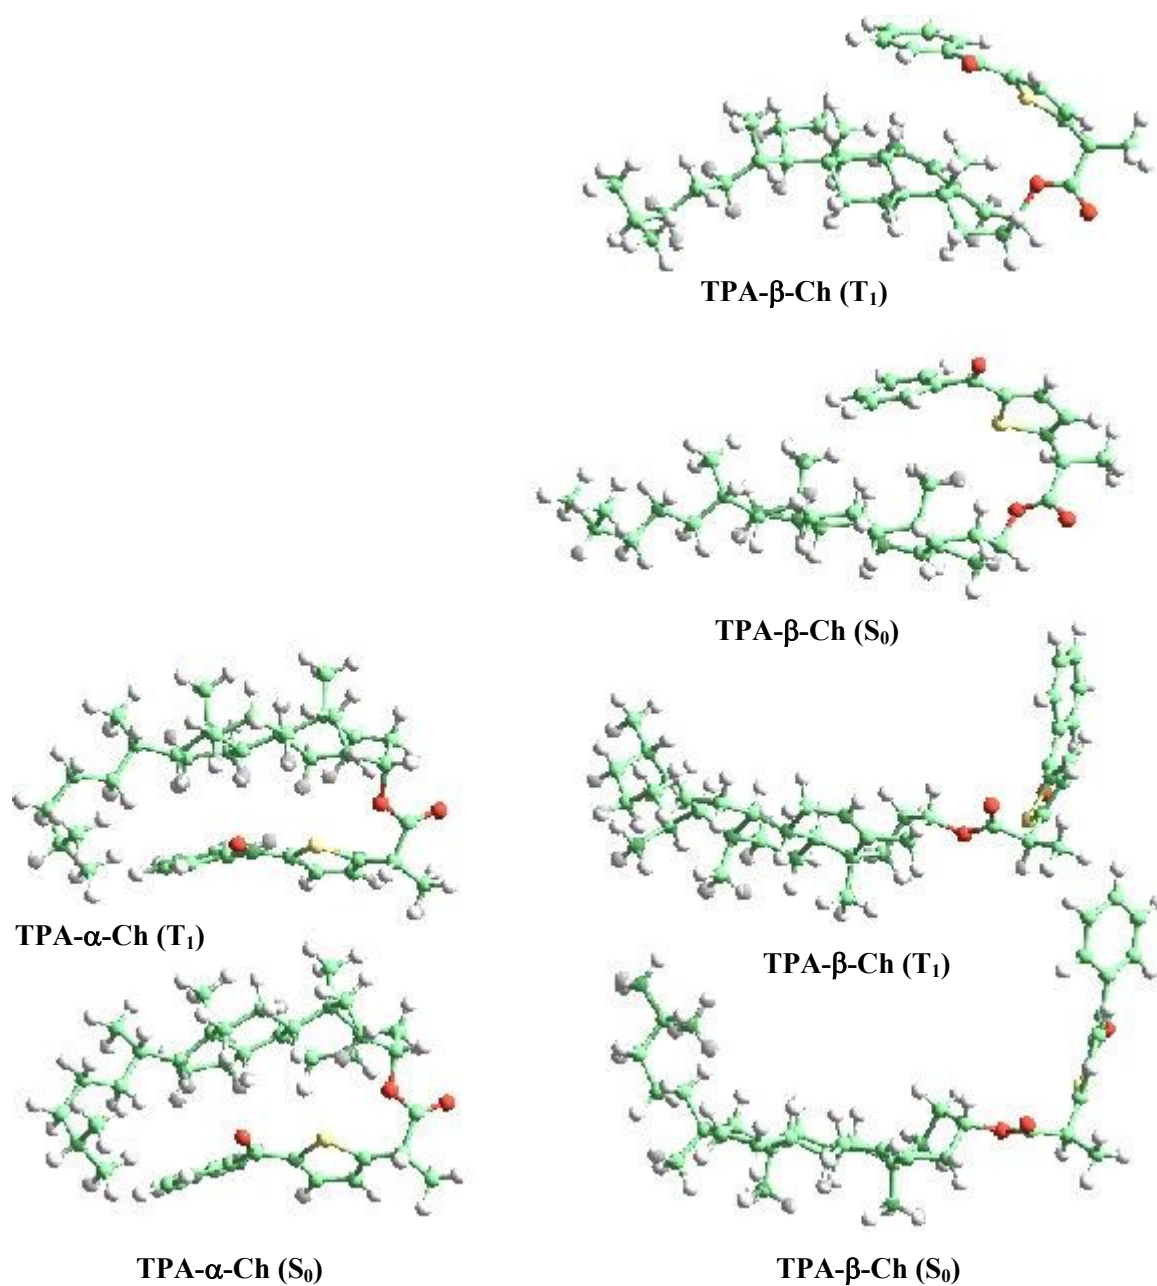

Optimized geometries of ground state ( $S_0$ ) and triplet excited state ( $T_1$ ) of TPA- $\alpha$ -Ch and TPA- $\beta$ -Ch using PBE-D3 functional. The effect of solvent has not been included, but the geometries have also been optimized using dichloromethane as solvent with very similar results. In TPA- $\beta$ -Ch, folded and unfolded have similar energies and for this reason both conformations have been calculated.

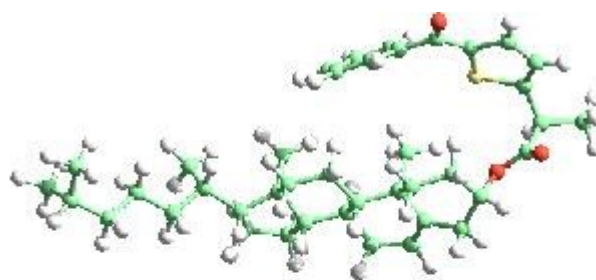**TPA- $\beta$ -Ch ( $T_1$ )**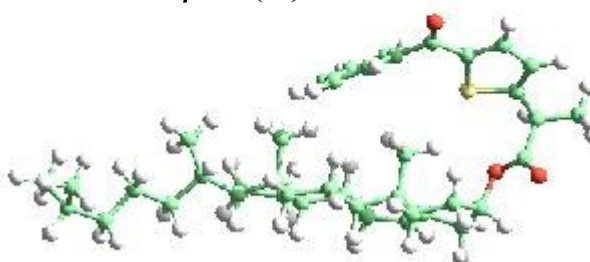**TPA- $\beta$ -Ch ( $S_0$ )**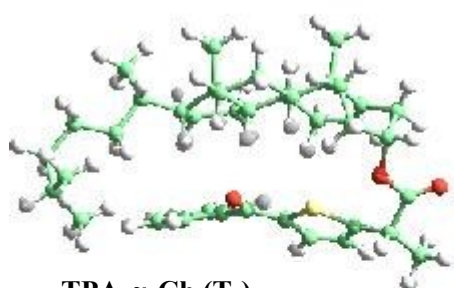**TPA- $\alpha$ -Ch ( $T_1$ )**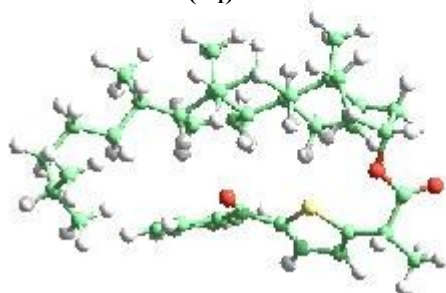**TPA- $\alpha$ -Ch ( $S_0$ )**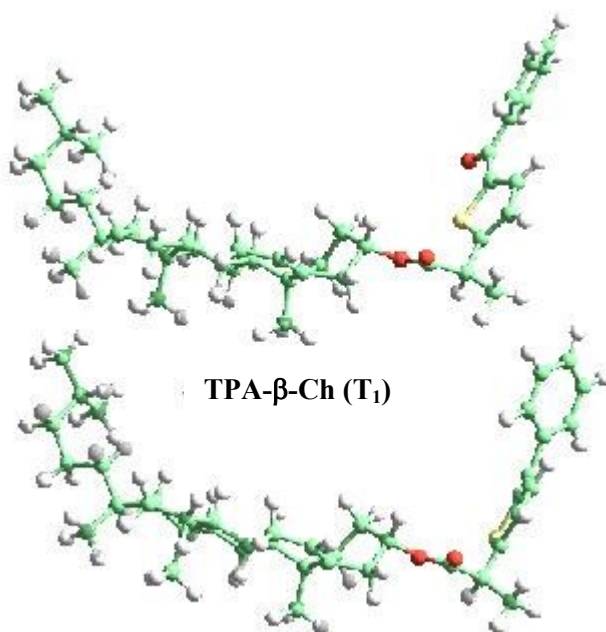**TPA- $\beta$ -Ch ( $T_1$ )**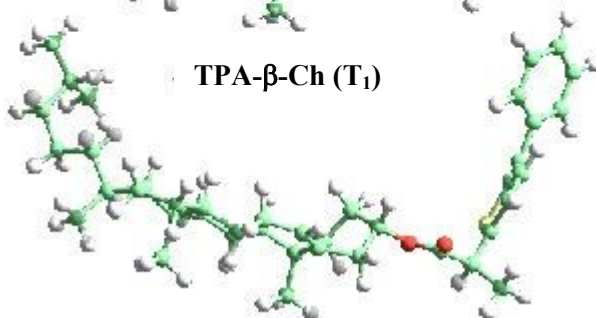**TPA- $\beta$ -Ch ( $S_0$ )**

Optimized geometries of ground state ( $S_0$ ) and triplet excited state ( $T_1$ ) of TPA- $\alpha$ -Ch and TPA- $\beta$ -Ch using M062X-D3 functional. The effect of solvent has not been included, but the geometries have also been optimized using dichloromethane as solvent with very similar results. In TPA- $\beta$ -Ch, folded and unfolded have similar energies and for this reason both conformations have been calculated.



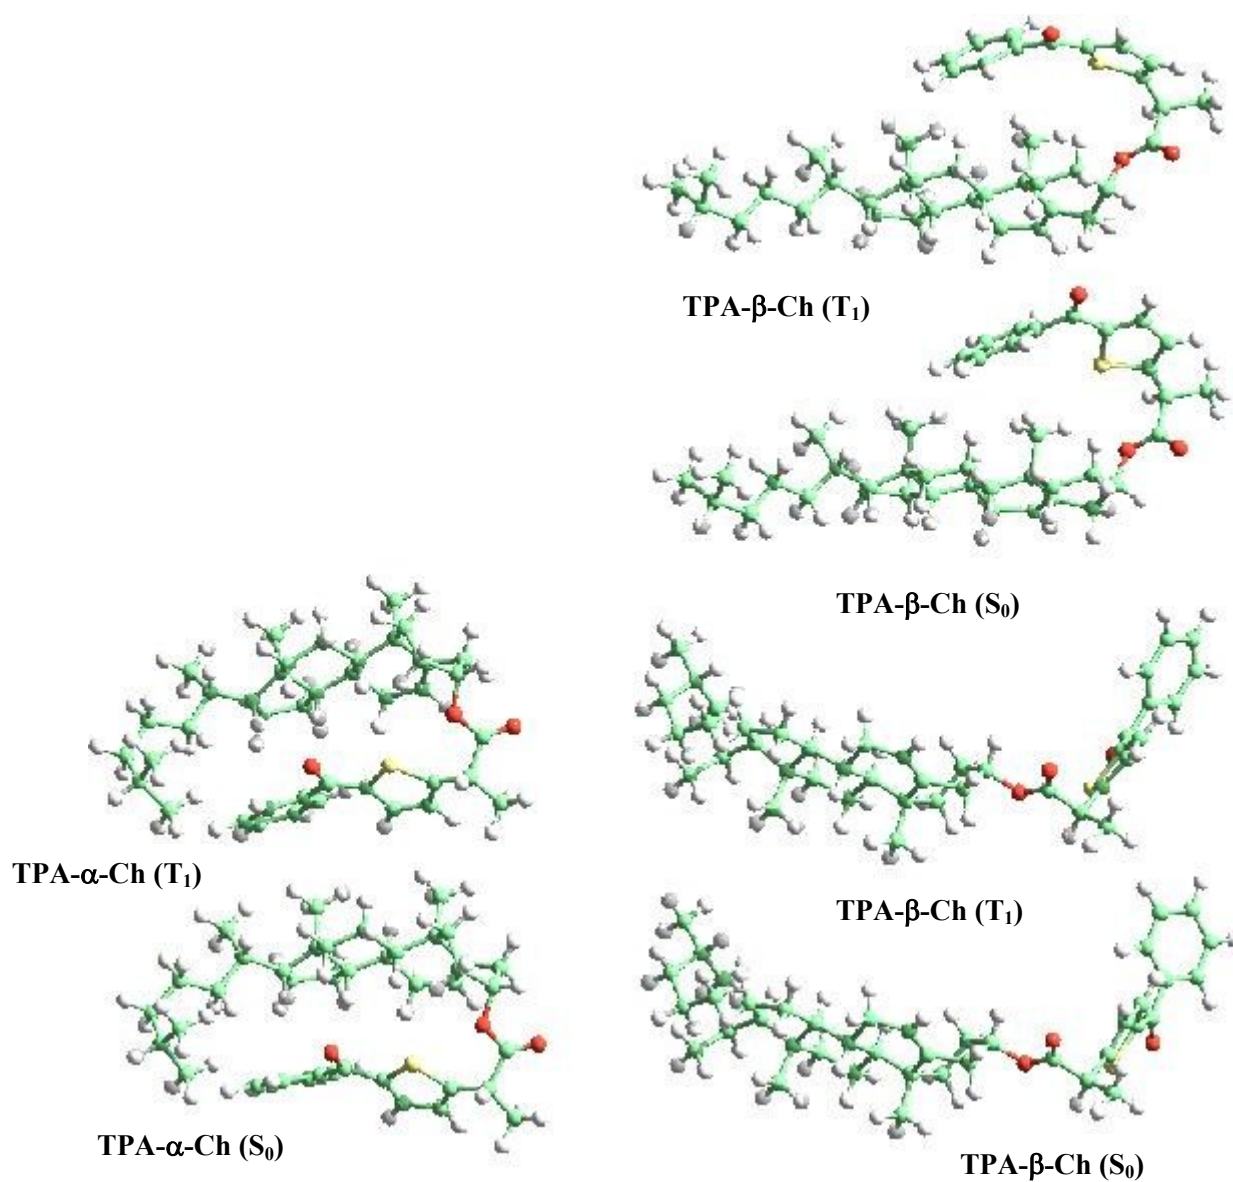

Optimized geometries of ground state ( $S_0$ ) and triplet excited state ( $T_1$ ) of TPA- $\alpha$ -Ch and TPA- $\beta$ -Ch using wB97XD functional. The effect of solvent has not been included, but the geometries have also been optimized using dichloromethane as solvent with very similar results. In TPA- $\beta$ -Ch, folded and unfolded have similar energies and for this reason both conformations have been calculated.
